# Supplementary material for: Galactic globular and open cluster fiducial sequences in the Pan-STARRS1 photometric system
Source: Oxford University Press journal article supplement (doi:10.1093/mnras/stu1081), 2014-06-28
Supplement: stu1081_Supplementary_Data.zip [file stu1081_Supplementary_Data.zip]

**Table A1.** Fiducial sequences for NGC 288.

| $g_{P1}$ | $r_{P1}$ | $i_{P1}$ | $z_{P1}$ | $y_{P1}$ |
|----------|----------|----------|----------|----------|
| 17.328   | 17.663   | 17.976   | 18.189   | 18.333   |
| 16.328   | 16.611   | 16.890   | 17.082   | 17.153   |
| 15.828   | 16.077   | 16.314   | 16.478   | 16.508   |
| 15.428   | 15.606   | 15.796   | 15.919   | 15.921   |
| 15.328   | 15.456   | 15.582   | 15.698   | 15.695   |
| 15.278   | 15.314   | 15.416   | 15.477   | 15.477   |
| <hr/>    |          |          |          |          |
| 13.300   | 12.150   | 11.723   | 11.436   | 11.315   |
| 13.500   | 12.449   | 12.038   | 11.805   | 11.675   |
| 13.700   | 12.734   | 12.341   | 12.148   | 12.015   |
| 13.900   | 13.005   | 12.631   | 12.466   | 12.333   |
| 14.100   | 13.263   | 12.909   | 12.762   | 12.634   |
| 14.300   | 13.513   | 13.177   | 13.043   | 12.921   |
| 14.500   | 13.756   | 13.437   | 13.312   | 13.197   |
| 14.700   | 13.993   | 13.690   | 13.572   | 13.464   |
| 14.900   | 14.226   | 13.937   | 13.824   | 13.723   |
| 15.100   | 14.455   | 14.179   | 14.071   | 13.975   |
| 15.300   | 14.680   | 14.418   | 14.312   | 14.222   |
| 15.500   | 14.903   | 14.652   | 14.550   | 14.465   |
| 15.700   | 15.123   | 14.882   | 14.784   | 14.704   |
| 15.900   | 15.342   | 15.111   | 15.014   | 14.939   |
| 16.100   | 15.558   | 15.336   | 15.243   | 15.170   |
| 16.300   | 15.773   | 15.558   | 15.468   | 15.399   |
| 16.500   | 15.987   | 15.779   | 15.692   | 15.626   |
| 16.700   | 16.200   | 15.998   | 15.914   | 15.851   |
| 16.900   | 16.412   | 16.215   | 16.134   | 16.074   |
| 17.100   | 16.622   | 16.431   | 16.353   | 16.295   |
| 17.300   | 16.832   | 16.645   | 16.571   | 16.514   |
| 17.500   | 17.041   | 16.858   | 16.789   | 16.732   |
| 17.700   | 17.250   | 17.070   | 17.005   | 16.949   |
| 18.000   | 17.562   | 17.385   | 17.327   | 17.272   |
| 18.100   | 17.666   | 17.490   | 17.434   | 17.379   |
| 18.200   | 17.771   | 17.603   | 17.545   | 17.491   |
| 18.300   | 17.884   | 17.714   | 17.662   | 17.609   |
| 18.400   | 17.998   | 17.831   | 17.778   | 17.734   |
| 18.500   | 18.125   | 17.976   | 17.939   | 17.902   |
| 18.600   | 18.280   | 18.159   | 18.141   | 18.127   |
| 18.700   | 18.416   | 18.316   | 18.312   | 18.300   |
| 18.800   | 18.530   | 18.440   | 18.443   | 18.430   |
| 18.900   | 18.639   | 18.555   | 18.562   | 18.551   |
| 19.000   | 18.743   | 18.663   | 18.667   | 18.658   |
| 19.200   | 18.947   | 18.867   | 18.867   | 18.863   |
| 19.400   | 19.143   | 19.060   | 19.061   | 19.042   |
| 19.600   | 19.332   | 19.244   | 19.240   | 19.221   |
| 19.800   | 19.519   | 19.426   | 19.418   | 19.394   |
| 20.000   | 19.704   | 19.604   | 19.592   | 19.562   |
| 20.200   | 19.888   | 19.778   | 19.763   | 19.724   |
| 20.400   | 20.068   | 19.948   | 19.929   | 19.882   |
| 20.600   | 20.247   | 20.115   | 20.090   | ...      |
| 20.800   | 20.424   | 20.278   | 20.245   | ...      |
| 21.000   | 20.599   | 20.438   | 20.393   | ...      |
| 21.200   | 20.771   | 20.594   | 20.534   | ...      |
| 21.400   | 20.941   | 20.748   | 20.667   | ...      |
| 21.600   | 21.108   | 20.898   | ...      | ...      |
| 21.800   | 21.273   | 21.046   | ...      | ...      |
| 22.000   | 21.435   | 21.190   | ...      | ...      |

**Table A2.** Fiducial sequences for NGC 1904 (M 79).

| $g_{P1}$ | $r_{P1}$ | $i_{P1}$ | $z_{P1}$ | $y_{P1}$ |
|----------|----------|----------|----------|----------|
| 18.154   | 18.464   | 18.755   | 18.964   | 19.115   |
| 17.154   | 17.412   | 17.669   | 17.857   | 17.935   |
| 16.654   | 16.878   | 17.093   | 17.253   | 17.290   |
| 16.254   | 16.407   | 16.575   | 16.694   | 16.703   |
| 16.154   | 16.257   | 16.361   | 16.473   | 16.477   |
| 16.104   | 16.115   | 16.195   | 16.252   | 16.259   |
| <hr/>    |          |          |          |          |
| 13.600   | 12.376   | 11.857   | 11.559   | 11.418   |
| 13.800   | 12.720   | 12.247   | 12.000   | 11.864   |
| 14.000   | 13.030   | 12.595   | 12.384   | 12.252   |
| 14.200   | 13.310   | 12.907   | 12.718   | 12.592   |
| 14.400   | 13.574   | 13.196   | 13.024   | 12.903   |
| 14.600   | 13.825   | 13.470   | 13.309   | 13.194   |
| 14.800   | 14.067   | 13.731   | 13.580   | 13.471   |
| 15.000   | 14.303   | 13.983   | 13.840   | 13.736   |
| 15.200   | 14.533   | 14.228   | 14.092   | 13.993   |
| 15.400   | 14.760   | 14.467   | 14.337   | 14.243   |
| 15.600   | 14.983   | 14.703   | 14.578   | 14.487   |
| 15.800   | 15.204   | 14.934   | 14.815   | 14.728   |
| 16.000   | 15.423   | 15.162   | 15.048   | 14.965   |
| 16.200   | 15.639   | 15.388   | 15.277   | 15.198   |
| 16.400   | 15.854   | 15.612   | 15.505   | 15.430   |
| 16.600   | 16.069   | 15.834   | 15.731   | 15.660   |
| 16.800   | 16.282   | 16.054   | 15.955   | 15.887   |
| 17.000   | 16.494   | 16.272   | 16.177   | 16.113   |
| 17.200   | 16.705   | 16.489   | 16.398   | 16.337   |
| 17.400   | 16.915   | 16.706   | 16.618   | 16.561   |
| 17.600   | 17.125   | 16.922   | 16.838   | 16.783   |
| 17.800   | 17.334   | 17.137   | 17.056   | 17.005   |
| 18.000   | 17.543   | 17.351   | 17.273   | 17.226   |
| 18.200   | 17.752   | 17.564   | 17.490   | 17.446   |
| 18.400   | 17.959   | 17.777   | 17.706   | 17.664   |
| 18.600   | 18.166   | 17.990   | 17.923   | 17.884   |
| 18.700   | 18.271   | 18.096   | 18.034   | 17.995   |
| 18.800   | 18.378   | 18.206   | 18.146   | 18.107   |
| 18.900   | 18.488   | 18.319   | 18.258   | 18.219   |
| 19.000   | 18.595   | 18.438   | 18.374   | 18.343   |
| 19.100   | 18.720   | 18.575   | 18.537   | 18.505   |
| 19.200   | 18.867   | 18.745   | 18.719   | 18.684   |
| 19.300   | 19.010   | 18.921   | 18.912   | 18.899   |
| 19.400   | 19.126   | 19.040   | 19.035   | 19.021   |
| 19.500   | 19.232   | 19.154   | 19.152   | 19.146   |
| 19.600   | 19.336   | 19.265   | 19.265   | 19.254   |
| 19.800   | 19.541   | 19.471   | 19.475   | 19.469   |
| 20.000   | 19.734   | 19.667   | 19.674   | 19.659   |
| 20.200   | 19.925   | 19.855   | 19.863   | 19.843   |
| 20.400   | 20.113   | 20.040   | 20.045   | 20.016   |
| 20.600   | 20.299   | 20.219   | 20.221   | 20.176   |
| 20.800   | 20.481   | 20.395   | 20.390   | ...      |
| 21.000   | 20.662   | 20.565   | 20.553   | ...      |
| 21.200   | 20.840   | 20.732   | 20.710   | ...      |
| 21.400   | 21.015   | 20.895   | 20.864   | ...      |
| 21.600   | 21.188   | 21.055   | 21.012   | ...      |
| 21.800   | 21.358   | 21.212   | ...      | ...      |
| 22.000   | 21.526   | 21.367   | ...      | ...      |

**Table A3.** Fiducial sequences for NGC 4590 (M 68).

| $g_{P1}$ | $r_{P1}$ | $i_{P1}$ | $z_{P1}$ | $y_{P1}$ |
|----------|----------|----------|----------|----------|
| 16.214   | 16.397   | 16.587   | 16.709   | 16.755   |
| 15.814   | 15.926   | 16.069   | 16.150   | 16.168   |
| 15.714   | 15.776   | 15.855   | 15.929   | 15.942   |
| 15.664   | 15.634   | 15.689   | 15.708   | 15.724   |
| 15.684   | 15.604   | 15.649   | 15.636   | 15.618   |
| 15.734   | 15.592   | 15.562   | 15.560   | 15.571   |
| 15.774   | 15.592   | 15.512   | 15.515   | 15.535   |
| 15.834   | 15.562   | 15.446   | 15.459   | 15.507   |
| 15.864   | 15.535   | 15.371   | 15.339   | 15.369   |
| <hr/>    |          |          |          |          |
| 13.100   | 12.035   | 11.637   | 11.341   | 11.143   |
| 13.300   | 12.317   | 11.928   | 11.670   | 11.517   |
| 13.500   | 12.585   | 12.208   | 11.981   | 11.855   |
| 13.700   | 12.840   | 12.477   | 12.274   | 12.162   |
| 13.900   | 13.087   | 12.736   | 12.550   | 12.450   |
| 14.100   | 13.327   | 12.989   | 12.817   | 12.724   |
| 14.300   | 13.562   | 13.237   | 13.074   | 12.988   |
| 14.500   | 13.793   | 13.478   | 13.324   | 13.243   |
| 14.700   | 14.020   | 13.716   | 13.569   | 13.492   |
| 14.900   | 14.245   | 13.950   | 13.810   | 13.736   |
| 15.100   | 14.467   | 14.182   | 14.046   | 13.977   |
| 15.300   | 14.687   | 14.411   | 14.280   | 14.213   |
| 15.500   | 14.905   | 14.638   | 14.511   | 14.447   |
| 15.700   | 15.121   | 14.862   | 14.740   | 14.679   |
| 15.900   | 15.337   | 15.085   | 14.967   | 14.908   |
| 16.100   | 15.551   | 15.306   | 15.192   | 15.136   |
| 16.300   | 15.765   | 15.526   | 15.415   | 15.363   |
| 16.500   | 15.978   | 15.745   | 15.638   | 15.588   |
| 16.700   | 16.189   | 15.963   | 15.860   | 15.812   |
| 16.900   | 16.400   | 16.179   | 16.080   | 16.035   |
| 17.100   | 16.611   | 16.395   | 16.301   | 16.257   |
| 17.300   | 16.821   | 16.611   | 16.519   | 16.479   |
| 17.500   | 17.030   | 16.824   | 16.737   | 16.699   |
| 17.700   | 17.239   | 17.038   | 16.955   | 16.920   |
| 18.000   | 17.552   | 17.358   | 17.280   | 17.249   |
| 18.100   | 17.656   | 17.465   | 17.389   | 17.359   |
| 18.200   | 17.760   | 17.570   | 17.497   | 17.468   |
| 18.300   | 17.878   | 17.690   | 17.621   | 17.595   |
| 18.400   | 17.999   | 17.815   | 17.746   | 17.732   |
| 18.500   | 18.123   | 17.969   | 17.917   | 17.897   |
| 18.600   | 18.264   | 18.140   | 18.098   | 18.098   |
| 18.700   | 18.403   | 18.295   | 18.280   | 18.275   |
| 18.800   | 18.530   | 18.435   | 18.416   | 18.422   |
| 18.900   | 18.642   | 18.555   | 18.543   | 18.553   |
| 19.000   | 18.750   | 18.667   | 18.658   | 18.671   |
| 19.200   | 18.959   | 18.876   | 18.873   | 18.880   |
| 19.400   | 19.153   | 19.069   | 19.061   | 19.074   |
| 19.600   | 19.344   | 19.255   | 19.242   | 19.250   |
| 19.800   | 19.533   | 19.438   | 19.421   | 19.426   |
| 20.000   | 19.722   | 19.618   | 19.597   | 19.600   |
| 20.200   | 19.909   | 19.796   | 19.771   | 19.772   |
| 20.400   | 20.094   | 19.971   | 19.942   | 19.938   |
| 20.600   | 20.278   | 20.143   | 20.108   | 20.097   |
| 20.800   | 20.459   | 20.313   | 20.271   | 20.248   |
| 21.000   | 20.637   | 20.479   | 20.429   | 20.389   |
| 21.200   | 20.813   | 20.642   | 20.582   | ...      |
| 21.400   | 20.986   | 20.801   | 20.731   | ...      |
| 21.600   | 21.157   | 20.957   | 20.874   | ...      |
| 21.800   | 21.323   | 21.109   | ...      | ...      |
| 22.000   | 21.485   | 21.258   | ...      | ...      |

**Table A4.** Fiducial sequences for NGC 5272 (M 3).

| $g_{P1}$ | $r_{P1}$ | $i_{P1}$ | $z_{P1}$ | $y_{P1}$ |
|----------|----------|----------|----------|----------|
| 16.119   | 16.355   | 16.615   | 16.739   | 16.777   |
| 15.719   | 15.884   | 16.097   | 16.180   | 16.190   |
| 15.619   | 15.734   | 15.883   | 15.959   | 15.964   |
| 15.569   | 15.592   | 15.717   | 15.738   | 15.746   |
| 15.589   | 15.562   | 15.677   | 15.666   | 15.640   |
| 15.639   | 15.550   | 15.590   | 15.590   | 15.593   |
| 15.679   | 15.550   | 15.540   | 15.545   | 15.557   |
| 15.739   | 15.520   | 15.474   | 15.489   | 15.529   |
| 15.769   | 15.493   | 15.399   | 15.369   | 15.391   |
| 15.749   | 15.376   | 15.313   | 15.209   | 15.181   |
| <hr/>    |          |          |          |          |
| 13.200   | 12.002   | 11.381   | 11.253   | 11.144   |
| 13.400   | 12.351   | 11.751   | 11.676   | 11.571   |
| 13.600   | 12.660   | 12.093   | 12.045   | 11.944   |
| 13.800   | 12.935   | 12.411   | 12.369   | 12.274   |
| 14.000   | 13.193   | 12.711   | 12.667   | 12.578   |
| 14.200   | 13.439   | 12.996   | 12.948   | 12.863   |
| 14.400   | 13.677   | 13.269   | 13.215   | 13.135   |
| 14.600   | 13.908   | 13.533   | 13.472   | 13.396   |
| 14.800   | 14.136   | 13.788   | 13.722   | 13.650   |
| 15.000   | 14.360   | 14.038   | 13.966   | 13.897   |
| 15.200   | 14.581   | 14.281   | 14.205   | 14.139   |
| 15.400   | 14.800   | 14.520   | 14.441   | 14.378   |
| 15.600   | 15.018   | 14.754   | 14.672   | 14.612   |
| 15.800   | 15.235   | 14.985   | 14.902   | 14.845   |
| 16.000   | 15.449   | 15.212   | 15.130   | 15.075   |
| 16.200   | 15.663   | 15.437   | 15.355   | 15.303   |
| 16.400   | 15.877   | 15.660   | 15.579   | 15.529   |
| 16.600   | 16.089   | 15.880   | 15.802   | 15.754   |
| 16.800   | 16.301   | 16.097   | 16.024   | 15.977   |
| 17.000   | 16.512   | 16.314   | 16.244   | 16.199   |
| 17.200   | 16.723   | 16.528   | 16.463   | 16.421   |
| 17.400   | 16.934   | 16.742   | 16.682   | 16.641   |
| 17.600   | 17.144   | 16.954   | 16.900   | 16.860   |
| 17.800   | 17.353   | 17.165   | 17.118   | 17.079   |
| 18.100   | 17.667   | 17.479   | 17.442   | 17.407   |
| 18.200   | 17.772   | 17.584   | 17.550   | 17.516   |
| 18.300   | 17.880   | 17.694   | 17.661   | 17.624   |
| 18.400   | 17.992   | 17.818   | 17.780   | 17.746   |
| 18.500   | 18.106   | 17.947   | 17.915   | 17.896   |
| 18.600   | 18.257   | 18.130   | 18.121   | 18.102   |
| 18.700   | 18.404   | 18.310   | 18.308   | 18.311   |
| 18.800   | 18.529   | 18.448   | 18.458   | 18.462   |
| 18.900   | 18.642   | 18.563   | 18.580   | 18.587   |
| 19.000   | 18.749   | 18.673   | 18.694   | 18.703   |
| 19.100   | 18.853   | 18.780   | 18.802   | 18.808   |
| 19.300   | 19.054   | 18.984   | 19.005   | 19.014   |
| 19.500   | 19.247   | 19.175   | 19.195   | 19.200   |
| 19.700   | 19.439   | 19.361   | 19.378   | 19.383   |
| 19.900   | 19.628   | 19.542   | 19.557   | 19.559   |
| 20.100   | 19.815   | 19.721   | 19.731   | 19.728   |
| 20.300   | 19.998   | 19.895   | 19.900   | 19.890   |
| 20.500   | 20.180   | 20.068   | 20.066   | 20.046   |
| 20.700   | 20.358   | 20.235   | 20.227   | 20.197   |
| 20.900   | 20.534   | 20.401   | 20.384   | 20.344   |
| 21.100   | 20.708   | 20.563   | 20.538   | ...      |
| 21.300   | 20.880   | 20.722   | 20.686   | ...      |
| 21.500   | 21.049   | 20.877   | 20.832   | ...      |
| 21.700   | 21.217   | 21.030   | 20.973   | ...      |
| 21.900   | 21.383   | 21.179   | 21.110   | ...      |

**Table A5.** Fiducial sequences for NGC 5897.

| $g_{P1}$ | $r_{P1}$ | $i_{P1}$ | $z_{P1}$ | $y_{P1}$ |
|----------|----------|----------|----------|----------|
| 17.360   | 17.509   | 17.721   | 17.850   | 17.913   |
| 16.860   | 16.975   | 17.145   | 17.246   | 17.268   |
| 16.460   | 16.504   | 16.627   | 16.687   | 16.681   |
| 16.360   | 16.354   | 16.413   | 16.466   | 16.455   |
| 16.310   | 16.212   | 16.247   | 16.245   | 16.237   |
| 16.330   | 16.182   | 16.207   | 16.173   | 16.131   |
| 13.900   | 12.713   | 12.097   | 11.978   | 11.820   |
| 14.100   | 13.035   | 12.492   | 12.328   | 12.180   |
| 14.300   | 13.328   | 12.842   | 12.652   | 12.512   |
| 14.500   | 13.594   | 13.148   | 12.950   | 12.819   |
| 14.700   | 13.844   | 13.430   | 13.230   | 13.105   |
| 14.900   | 14.085   | 13.694   | 13.498   | 13.379   |
| 15.100   | 14.318   | 13.947   | 13.755   | 13.642   |
| 15.300   | 14.546   | 14.191   | 14.005   | 13.896   |
| 15.500   | 14.771   | 14.429   | 14.249   | 14.145   |
| 15.700   | 14.991   | 14.663   | 14.489   | 14.388   |
| 15.900   | 15.211   | 14.893   | 14.725   | 14.628   |
| 16.100   | 15.427   | 15.119   | 14.957   | 14.864   |
| 16.300   | 15.643   | 15.344   | 15.187   | 15.096   |
| 16.500   | 15.858   | 15.565   | 15.414   | 15.327   |
| 16.700   | 16.072   | 15.786   | 15.640   | 15.556   |
| 16.900   | 16.284   | 16.005   | 15.865   | 15.782   |
| 17.100   | 16.496   | 16.224   | 16.087   | 16.007   |
| 17.300   | 16.707   | 16.440   | 16.308   | 16.231   |
| 17.500   | 16.918   | 16.656   | 16.529   | 16.453   |
| 17.700   | 17.129   | 16.871   | 16.749   | 16.674   |
| 17.900   | 17.339   | 17.086   | 16.968   | 16.895   |
| 18.100   | 17.549   | 17.300   | 17.185   | 17.115   |
| 18.300   | 17.758   | 17.514   | 17.402   | 17.334   |
| 18.500   | 17.967   | 17.726   | 17.619   | 17.552   |
| 18.700   | 18.176   | 17.939   | 17.835   | 17.769   |
| 18.900   | 18.387   | 18.152   | 18.053   | 17.982   |
| 19.000   | 18.491   | 18.263   | 18.169   | 18.107   |
| 19.100   | 18.597   | 18.373   | 18.284   | 18.223   |
| 19.200   | 18.709   | 18.489   | 18.401   | 18.343   |
| 19.300   | 18.831   | 18.618   | 18.539   | 18.484   |
| 19.400   | 18.963   | 18.765   | 18.709   | 18.658   |
| 19.500   | 19.113   | 18.939   | 18.890   | 18.843   |
| 19.600   | 19.241   | 19.090   | 19.044   | 19.009   |
| 19.700   | 19.353   | 19.211   | 19.176   | 19.150   |
| 19.800   | 19.461   | 19.325   | 19.301   | 19.281   |
| 19.900   | 19.569   | 19.435   | 19.414   | 19.396   |
| 20.100   | 19.772   | 19.640   | 19.619   | 19.594   |
| 20.300   | 19.966   | 19.834   | 19.812   | 19.786   |
| 20.500   | 20.157   | 20.022   | 20.000   | 19.970   |
| 20.700   | 20.344   | 20.201   | 20.181   | 20.145   |
| 20.900   | 20.530   | 20.375   | 20.354   | 20.305   |
| 21.100   | 20.712   | 20.545   | 20.522   | ...      |
| 21.300   | 20.893   | 20.710   | 20.685   | ...      |
| 21.500   | 21.070   | 20.871   | 20.845   | ...      |
| 21.700   | 21.244   | 21.030   | ...      | ...      |
| 21.900   | 21.415   | 21.187   | ...      | ...      |

**Table A6.** Fiducial sequences for NGC 5904 (M 5).

| $g_{P1}$ | $r_{P1}$ | $i_{P1}$ | $z_{P1}$ | $y_{P1}$ |
|----------|----------|----------|----------|----------|
| 16.076   | 16.321   | 16.601   | 16.786   | 16.868   |
| 15.576   | 15.787   | 16.025   | 16.182   | 16.223   |
| 15.176   | 15.316   | 15.507   | 15.623   | 15.636   |
| 15.076   | 15.166   | 15.293   | 15.402   | 15.410   |
| 15.026   | 15.024   | 15.127   | 15.181   | 15.192   |
| 15.046   | 14.994   | 15.087   | 15.109   | 15.086   |
| 15.096   | 14.982   | 15.000   | 15.033   | 15.039   |
| 15.136   | 14.982   | 14.950   | 14.988   | 15.003   |
| 15.196   | 14.952   | 14.884   | 14.932   | 14.975   |
| 15.226   | 14.925   | 14.809   | 14.812   | 14.837   |
| 15.206   | 14.808   | 14.723   | 14.652   | 14.627   |
| 13.600   | 12.721   | 12.279   | 12.172   | 12.129   |
| 13.800   | 12.975   | 12.585   | 12.457   | 12.401   |
| 14.000   | 13.222   | 12.871   | 12.732   | 12.667   |
| 14.200   | 13.460   | 13.139   | 12.997   | 12.926   |
| 14.400   | 13.694   | 13.393   | 13.253   | 13.180   |
| 14.600   | 13.922   | 13.639   | 13.501   | 13.430   |
| 14.800   | 14.148   | 13.877   | 13.744   | 13.675   |
| 15.000   | 14.370   | 14.111   | 13.983   | 13.917   |
| 15.200   | 14.590   | 14.340   | 14.218   | 14.154   |
| 15.400   | 14.807   | 14.566   | 14.449   | 14.389   |
| 15.600   | 15.024   | 14.788   | 14.677   | 14.621   |
| 15.800   | 15.238   | 15.010   | 14.903   | 14.851   |
| 16.000   | 15.452   | 15.229   | 15.127   | 15.077   |
| 16.200   | 15.663   | 15.446   | 15.348   | 15.302   |
| 16.400   | 15.875   | 15.662   | 15.569   | 15.524   |
| 16.600   | 16.086   | 15.877   | 15.788   | 15.746   |
| 16.800   | 16.295   | 16.092   | 16.005   | 15.965   |
| 17.000   | 16.505   | 16.305   | 16.221   | 16.182   |
| 17.200   | 16.713   | 16.517   | 16.437   | 16.399   |
| 17.500   | 17.025   | 16.834   | 16.758   | 16.721   |
| 17.600   | 17.130   | 16.942   | 16.867   | 16.828   |
| 17.700   | 17.236   | 17.051   | 16.981   | 16.947   |
| 17.800   | 17.343   | 17.161   | 17.091   | 17.062   |
| 17.900   | 17.453   | 17.277   | 17.211   | 17.184   |
| 18.000   | 17.576   | 17.409   | 17.355   | 17.329   |
| 18.100   | 17.733   | 17.612   | 17.573   | 17.573   |
| 18.200   | 17.880   | 17.777   | 17.755   | 17.755   |
| 18.300   | 18.000   | 17.907   | 17.890   | 17.895   |
| 18.400   | 18.109   | 18.021   | 18.009   | 18.015   |
| 18.500   | 18.213   | 18.130   | 18.121   | 18.126   |
| 18.700   | 18.418   | 18.335   | 18.328   | 18.333   |
| 18.900   | 18.614   | 18.531   | 18.522   | 18.527   |
| 19.100   | 18.805   | 18.717   | 18.706   | 18.708   |
| 19.300   | 18.994   | 18.900   | 18.886   | 18.886   |
| 19.500   | 19.180   | 19.079   | 19.061   | 19.059   |
| 19.700   | 19.363   | 19.254   | 19.230   | 19.227   |
| 19.900   | 19.543   | 19.425   | 19.395   | 19.390   |
| 20.100   | 19.722   | 19.593   | 19.556   | 19.548   |
| 20.300   | 19.898   | 19.758   | 19.713   | 19.700   |
| 20.500   | 20.071   | 19.918   | 19.866   | 19.847   |
| 20.700   | 20.243   | 20.076   | 20.015   | 19.989   |
| 20.900   | 20.413   | 20.231   | 20.160   | 20.125   |
| 21.100   | 20.580   | 20.382   | 20.302   | 20.256   |
| 21.300   | 20.746   | 20.531   | 20.441   | 20.381   |
| 21.500   | 20.909   | 20.677   | 20.577   | 20.502   |
| 21.700   | 21.071   | 20.820   | 20.710   | ...      |
| 21.900   | 21.231   | 20.962   | 20.840   | ...      |
| 22.100   | 21.389   | 21.101   | 20.969   | ...      |
| 22.300   | 21.545   | 21.237   | ...      | ...      |
| 22.500   | 21.700   | 21.372   | ...      | ...      |

**Table A7.** Fiducial sequences for NGC 6205 (M 13).

| $g_{P1}$ | $r_{P1}$ | $i_{P1}$ | $z_{P1}$ | $y_{P1}$ |
|----------|----------|----------|----------|----------|
| 18.446   | 18.879   | 19.241   | 19.559   | 19.833   |
| 17.696   | 18.072   | 18.398   | 18.648   | 18.837   |
| 16.946   | 17.280   | 17.580   | 17.791   | 17.968   |
| 15.946   | 16.228   | 16.494   | 16.684   | 16.788   |
| 15.446   | 15.694   | 15.918   | 16.080   | 16.143   |
| 15.046   | 15.223   | 15.400   | 15.521   | 15.556   |
| 14.946   | 15.073   | 15.186   | 15.300   | 15.330   |
| 14.896   | 14.931   | 15.020   | 15.079   | 15.112   |
| 14.916   | 14.901   | 14.980   | 15.007   | 15.006   |
| <hr/>    |          |          |          |          |
| 12.500   | 11.334   | 10.922   | 10.559   | 10.523   |
| 12.700   | 11.649   | 11.238   | 10.943   | 10.908   |
| 12.900   | 11.940   | 11.538   | 11.291   | 11.258   |
| 13.100   | 12.213   | 11.825   | 11.611   | 11.579   |
| 13.300   | 12.474   | 12.102   | 11.912   | 11.880   |
| 13.500   | 12.724   | 12.370   | 12.198   | 12.165   |
| 13.700   | 12.967   | 12.630   | 12.471   | 12.439   |
| 13.900   | 13.205   | 12.883   | 12.735   | 12.703   |
| 14.100   | 13.437   | 13.130   | 12.991   | 12.960   |
| 14.300   | 13.665   | 13.373   | 13.241   | 13.210   |
| 14.500   | 13.890   | 13.612   | 13.485   | 13.456   |
| 14.700   | 14.113   | 13.846   | 13.724   | 13.696   |
| 14.900   | 14.333   | 14.078   | 13.961   | 13.934   |
| 15.100   | 14.551   | 14.306   | 14.193   | 14.167   |
| 15.300   | 14.768   | 14.531   | 14.423   | 14.398   |
| 15.500   | 14.983   | 14.755   | 14.650   | 14.628   |
| 15.700   | 15.196   | 14.976   | 14.875   | 14.854   |
| 15.900   | 15.408   | 15.195   | 15.099   | 15.079   |
| 16.100   | 15.620   | 15.413   | 15.320   | 15.303   |
| 16.300   | 15.831   | 15.630   | 15.540   | 15.525   |
| 16.500   | 16.041   | 15.844   | 15.759   | 15.746   |
| 16.700   | 16.250   | 16.058   | 15.977   | 15.965   |
| 16.900   | 16.459   | 16.270   | 16.193   | 16.184   |
| 17.100   | 16.667   | 16.481   | 16.409   | 16.402   |
| 17.400   | 16.977   | 16.796   | 16.730   | 16.727   |
| 17.500   | 17.081   | 16.901   | 16.837   | 16.835   |
| 17.600   | 17.186   | 17.014   | 16.947   | 16.946   |
| 17.700   | 17.292   | 17.123   | 17.060   | 17.063   |
| 17.800   | 17.402   | 17.235   | 17.177   | 17.183   |
| 17.900   | 17.521   | 17.361   | 17.311   | 17.319   |
| 18.000   | 17.652   | 17.508   | 17.470   | 17.481   |
| 18.100   | 17.797   | 17.680   | 17.655   | 17.685   |
| 18.200   | 17.927   | 17.831   | 17.813   | 17.850   |
| 18.300   | 18.044   | 17.954   | 17.945   | 17.987   |
| 18.400   | 18.157   | 18.073   | 18.068   | 18.106   |
| 18.600   | 18.365   | 18.288   | 18.286   | 18.324   |
| 18.800   | 18.562   | 18.487   | 18.485   | 18.525   |
| 19.000   | 18.757   | 18.675   | 18.670   | 18.709   |
| 19.200   | 18.947   | 18.859   | 18.851   | 18.891   |
| 19.400   | 19.135   | 19.041   | 19.028   | 19.067   |
| 19.600   | 19.320   | 19.218   | 19.201   | 19.238   |
| 19.800   | 19.503   | 19.392   | 19.370   | 19.405   |
| 20.000   | 19.683   | 19.562   | 19.534   | 19.566   |
| 20.200   | 19.860   | 19.729   | 19.694   | 19.721   |
| 20.400   | 20.035   | 19.893   | 19.851   | 19.872   |
| 20.600   | 20.208   | 20.054   | 20.004   | 20.017   |
| 20.800   | 20.379   | 20.212   | 20.154   | 20.158   |
| 21.000   | 20.548   | 20.368   | 20.300   | 20.293   |
| 21.200   | 20.716   | 20.521   | 20.443   | 20.423   |
| 21.400   | 20.882   | 20.671   | 20.583   | 20.548   |
| 21.600   | 21.047   | 20.820   | 20.720   | ...      |
| 21.800   | 21.210   | 20.966   | 20.854   | ...      |
| 22.000   | 21.373   | 21.111   | 20.985   | ...      |
| 22.200   | 21.534   | 21.254   | 21.114   | ...      |
| 22.400   | 21.695   | 21.394   | 21.240   | ...      |

**Table A8.** Fiducial sequences for NGC 6341 (M 92).

| $g_{P1}$ | $r_{P1}$ | $i_{P1}$ | $z_{P1}$ | $y_{P1}$ |
|----------|----------|----------|----------|----------|
| 16.187   | 16.460   | 16.755   | 16.912   | 17.001   |
| 15.687   | 15.926   | 16.179   | 16.308   | 16.356   |
| 15.287   | 15.455   | 15.661   | 15.749   | 15.769   |
| 15.187   | 15.305   | 15.447   | 15.528   | 15.543   |
| 15.137   | 15.163   | 15.281   | 15.307   | 15.325   |
| <hr/>    |          |          |          |          |
| 12.700   | 11.848   | 11.454   | 11.218   | 11.085   |
| 12.900   | 12.093   | 11.734   | 11.512   | 11.401   |
| 13.100   | 12.331   | 12.001   | 11.791   | 11.694   |
| 13.300   | 12.566   | 12.255   | 12.058   | 11.970   |
| 13.500   | 12.797   | 12.501   | 12.316   | 12.235   |
| 13.700   | 13.025   | 12.742   | 12.569   | 12.491   |
| 13.900   | 13.249   | 12.979   | 12.815   | 12.741   |
| 14.100   | 13.472   | 13.211   | 13.057   | 12.985   |
| 14.300   | 13.693   | 13.441   | 13.295   | 13.225   |
| 14.500   | 13.912   | 13.668   | 13.530   | 13.462   |
| 14.700   | 14.131   | 13.894   | 13.763   | 13.696   |
| 14.900   | 14.348   | 14.118   | 13.993   | 13.928   |
| 15.100   | 14.563   | 14.341   | 14.221   | 14.159   |
| 15.300   | 14.778   | 14.562   | 14.447   | 14.387   |
| 15.500   | 14.991   | 14.782   | 14.672   | 14.614   |
| 15.700   | 15.205   | 15.002   | 14.895   | 14.840   |
| 15.900   | 15.417   | 15.221   | 15.118   | 15.065   |
| 16.100   | 15.628   | 15.440   | 15.339   | 15.289   |
| 16.300   | 15.839   | 15.657   | 15.559   | 15.512   |
| 16.500   | 16.050   | 15.875   | 15.778   | 15.735   |
| 16.700   | 16.261   | 16.092   | 15.997   | 15.957   |
| 16.900   | 16.470   | 16.308   | 16.216   | 16.178   |
| 17.100   | 16.679   | 16.524   | 16.433   | 16.399   |
| 17.300   | 16.888   | 16.740   | 16.650   | 16.620   |
| 17.600   | 17.200   | 17.063   | 16.974   | 16.950   |
| 17.700   | 17.305   | 17.170   | 17.082   | 17.059   |
| 17.800   | 17.417   | 17.283   | 17.204   | 17.179   |
| 17.900   | 17.535   | 17.409   | 17.336   | 17.321   |
| 18.000   | 17.661   | 17.552   | 17.491   | 17.479   |
| 18.100   | 17.801   | 17.716   | 17.670   | 17.664   |
| 18.200   | 17.933   | 17.871   | 17.829   | 17.842   |
| 18.300   | 18.056   | 18.010   | 17.977   | 17.988   |
| 18.400   | 18.169   | 18.134   | 18.105   | 18.120   |
| 18.500   | 18.276   | 18.244   | 18.220   | 18.238   |
| 18.600   | 18.383   | 18.349   | 18.326   | 18.348   |
| 18.800   | 18.583   | 18.548   | 18.528   | 18.553   |
| 19.000   | 18.775   | 18.742   | 18.723   | 18.743   |
| 19.200   | 18.968   | 18.932   | 18.903   | 18.920   |
| 19.400   | 19.156   | 19.117   | 19.080   | 19.097   |
| 19.600   | 19.341   | 19.298   | 19.253   | 19.268   |
| 19.800   | 19.525   | 19.475   | 19.423   | 19.435   |
| 20.000   | 19.705   | 19.648   | 19.588   | 19.597   |
| 20.200   | 19.885   | 19.818   | 19.750   | 19.751   |
| 20.400   | 20.061   | 19.986   | 19.908   | 19.897   |
| 20.600   | 20.235   | 20.150   | 20.062   | ...      |
| 20.800   | 20.408   | 20.311   | 20.214   | ...      |
| 21.000   | 20.580   | 20.469   | 20.362   | ...      |
| 21.200   | 20.750   | 20.626   | 20.507   | ...      |
| 21.400   | 20.919   | 20.780   | 20.648   | ...      |
| 21.600   | 21.087   | 20.933   | 20.787   | ...      |
| 21.800   | 21.255   | 21.085   | 20.923   | ...      |
| 22.000   | 21.422   | 21.234   | 21.056   | ...      |
| 22.200   | 21.589   | 21.383   | ...      | ...      |
| 22.400   | 21.754   | 21.529   | ...      | ...      |

**Table A9.** Fiducial sequences for NGC 6838 (M 71).

| $g_{P1}$ | $r_{P1}$ | $i_{P1}$ | $z_{P1}$ | $y_{P1}$ |
|----------|----------|----------|----------|----------|
| 12.800   | 11.266   | 10.642   | 10.223   | 9.878    |
| 13.000   | 11.575   | 10.990   | 10.634   | 10.349   |
| 13.200   | 11.871   | 11.319   | 11.010   | 10.770   |
| 13.400   | 12.154   | 11.629   | 11.351   | 11.141   |
| 13.600   | 12.424   | 11.922   | 11.665   | 11.476   |
| 13.800   | 12.685   | 12.203   | 11.959   | 11.786   |
| 14.000   | 12.938   | 12.473   | 12.239   | 12.077   |
| 14.200   | 13.185   | 12.735   | 12.507   | 12.354   |
| 14.400   | 13.425   | 12.988   | 12.766   | 12.619   |
| 14.600   | 13.661   | 13.236   | 13.017   | 12.876   |
| 14.800   | 13.892   | 13.478   | 13.262   | 13.126   |
| 15.000   | 14.119   | 13.715   | 13.502   | 13.370   |
| 15.200   | 14.344   | 13.948   | 13.738   | 13.609   |
| 15.400   | 14.565   | 14.177   | 13.970   | 13.844   |
| 15.600   | 14.784   | 14.404   | 14.198   | 14.076   |
| 15.800   | 15.001   | 14.627   | 14.424   | 14.304   |
| 16.000   | 15.216   | 14.848   | 14.648   | 14.530   |
| 16.200   | 15.428   | 15.067   | 14.870   | 14.754   |
| 16.400   | 15.640   | 15.284   | 15.090   | 14.976   |
| 16.600   | 15.849   | 15.499   | 15.308   | 15.196   |
| 16.800   | 16.058   | 15.712   | 15.525   | 15.415   |
| 17.000   | 16.265   | 15.924   | 15.741   | 15.632   |
| 17.200   | 16.471   | 16.134   | 15.955   | 15.848   |
| 17.300   | 16.574   | 16.239   | 16.062   | 15.956   |
| 17.400   | 16.677   | 16.344   | 16.169   | 16.064   |
| 17.500   | 16.779   | 16.448   | 16.274   | 16.173   |
| 17.600   | 16.879   | 16.556   | 16.379   | 16.283   |
| 17.700   | 17.008   | 16.696   | 16.536   | 16.448   |
| 17.800   | 17.174   | 16.897   | 16.763   | 16.701   |
| 17.900   | 17.321   | 17.070   | 16.941   | 16.876   |
| 18.000   | 17.447   | 17.200   | 17.080   | 17.018   |
| 18.100   | 17.558   | 17.313   | 17.199   | 17.135   |
| 18.200   | 17.663   | 17.422   | 17.301   | 17.241   |
| 18.400   | 17.857   | 17.616   | 17.501   | 17.445   |
| 18.600   | 18.051   | 17.805   | 17.695   | 17.636   |
| 18.800   | 18.240   | 17.988   | 17.874   | 17.811   |
| 19.000   | 18.425   | 18.166   | 18.050   | 17.982   |
| 19.200   | 18.607   | 18.339   | 18.221   | 18.150   |
| 19.400   | 18.785   | 18.508   | 18.387   | 18.314   |
| 19.600   | 18.961   | 18.672   | 18.549   | 18.472   |
| 19.800   | 19.133   | 18.833   | 18.707   | 18.626   |
| 20.000   | 19.303   | 18.990   | 18.860   | 18.775   |
| 20.200   | 19.470   | 19.143   | 19.007   | 18.918   |
| 20.400   | 19.634   | 19.293   | 19.150   | 19.054   |
| 20.600   | 19.797   | 19.440   | 19.288   | 19.183   |
| 20.800   | 19.957   | 19.585   | 19.420   | ...      |
| 21.000   | 20.115   | 19.727   | 19.547   | ...      |
| 21.200   | 20.272   | 19.867   | 19.669   | ...      |
| 21.400   | 20.427   | 20.005   | ...      | ...      |
| 21.600   | 20.580   | 20.141   | ...      | ...      |

**Table A10.** Fiducial sequences for NGC 7078 (M 15).

| $g_{P1}$ | $r_{P1}$ | $i_{P1}$ | $z_{P1}$ | $y_{P1}$ |
|----------|----------|----------|----------|----------|
| 17.917   | 18.154   | 18.415   | 18.584   | 18.721   |
| 16.917   | 17.102   | 17.329   | 17.477   | 17.541   |
| 16.417   | 16.568   | 16.753   | 16.873   | 16.896   |
| 16.017   | 16.097   | 16.235   | 16.314   | 16.309   |
| 15.917   | 15.947   | 16.021   | 16.093   | 16.083   |
| 15.867   | 15.805   | 15.855   | 15.872   | 15.865   |
| 15.887   | 15.775   | 15.815   | 15.800   | 15.759   |
| 15.937   | 15.763   | 15.728   | 15.724   | 15.712   |
| 15.977   | 15.763   | 15.678   | 15.679   | 15.676   |
| 16.037   | 15.733   | 15.612   | 15.623   | 15.648   |
| 16.067   | 15.706   | 15.537   | 15.503   | 15.510   |
| 13.200   | 12.102   | 11.601   | 11.435   | 11.322   |
| 13.400   | 12.379   | 11.912   | 11.740   | 11.630   |
| 13.600   | 12.645   | 12.207   | 12.032   | 11.925   |
| 13.800   | 12.901   | 12.488   | 12.312   | 12.209   |
| 14.000   | 13.149   | 12.758   | 12.583   | 12.483   |
| 14.200   | 13.392   | 13.018   | 12.847   | 12.750   |
| 14.400   | 13.629   | 13.272   | 13.103   | 13.011   |
| 14.600   | 13.862   | 13.519   | 13.355   | 13.265   |
| 14.800   | 14.091   | 13.762   | 13.601   | 13.515   |
| 15.000   | 14.317   | 13.999   | 13.843   | 13.761   |
| 15.200   | 14.541   | 14.234   | 14.082   | 14.003   |
| 15.400   | 14.762   | 14.465   | 14.318   | 14.242   |
| 15.600   | 14.982   | 14.693   | 14.551   | 14.479   |
| 15.800   | 15.199   | 14.919   | 14.782   | 14.712   |
| 16.000   | 15.415   | 15.144   | 15.011   | 14.944   |
| 16.200   | 15.630   | 15.366   | 15.238   | 15.173   |
| 16.400   | 15.843   | 15.587   | 15.462   | 15.401   |
| 16.600   | 16.056   | 15.806   | 15.686   | 15.627   |
| 16.800   | 16.267   | 16.024   | 15.908   | 15.852   |
| 17.000   | 16.478   | 16.241   | 16.129   | 16.075   |
| 17.200   | 16.688   | 16.457   | 16.349   | 16.297   |
| 17.400   | 16.897   | 16.672   | 16.567   | 16.519   |
| 17.600   | 17.106   | 16.886   | 16.786   | 16.739   |
| 17.800   | 17.313   | 17.099   | 17.002   | 16.958   |
| 18.000   | 17.521   | 17.312   | 17.219   | 17.176   |
| 18.200   | 17.728   | 17.524   | 17.434   | 17.394   |
| 18.300   | 17.832   | 17.630   | 17.542   | 17.504   |
| 18.400   | 17.939   | 17.741   | 17.658   | 17.620   |
| 18.500   | 18.047   | 17.852   | 17.778   | 17.741   |
| 18.600   | 18.166   | 17.982   | 17.908   | 17.878   |
| 18.700   | 18.294   | 18.121   | 18.050   | 18.033   |
| 18.800   | 18.430   | 18.275   | 18.221   | 18.206   |
| 18.900   | 18.561   | 18.431   | 18.386   | 18.379   |
| 19.000   | 18.689   | 18.576   | 18.540   | 18.535   |
| 19.100   | 18.804   | 18.701   | 18.669   | 18.672   |
| 19.200   | 18.912   | 18.816   | 18.783   | 18.791   |
| 19.400   | 19.118   | 19.029   | 19.000   | 19.014   |
| 19.600   | 19.318   | 19.223   | 19.194   | 19.207   |
| 19.800   | 19.509   | 19.410   | 19.380   | 19.392   |
| 20.000   | 19.699   | 19.594   | 19.563   | 19.573   |
| 20.200   | 19.888   | 19.775   | 19.742   | 19.747   |
| 20.400   | 20.074   | 19.954   | 19.916   | 19.916   |
| 20.600   | 20.258   | 20.129   | 20.086   | 20.077   |
| 20.800   | 20.441   | 20.301   | 20.251   | 20.232   |
| 21.000   | 20.622   | 20.471   | 20.411   | 20.377   |
| 21.200   | 20.801   | 20.638   | 20.565   | ...      |
| 21.400   | 20.978   | 20.802   | 20.714   | ...      |
| 21.600   | 21.153   | 20.962   | 20.859   | ...      |
| 21.800   | 21.325   | 21.121   | ...      | ...      |
| 22.000   | 21.496   | 21.277   | ...      | ...      |
| 22.200   | 21.665   | 21.430   | ...      | ...      |
| 22.400   | 21.832   | 21.581   | ...      | ...      |
| 22.600   | 21.996   | 21.730   | ...      | ...      |
| 22.800   | 22.159   | 21.876   | ...      | ...      |
| 23.000   | 22.318   | 22.017   | ...      | ...      |

**Table A11.** Fiducial sequences for NGC 7089 (M 2).

| $g_{P1}$ | $r_{P1}$ | $i_{P1}$ | $z_{P1}$ | $y_{P1}$ |
|----------|----------|----------|----------|----------|
| 19.519   | 19.915   | 20.277   | 20.586   | 20.812   |
| 18.769   | 19.108   | 19.434   | 19.675   | 19.816   |
| 18.019   | 18.316   | 18.616   | 18.818   | 18.947   |
| 17.019   | 17.264   | 17.530   | 17.711   | 17.767   |
| 16.519   | 16.730   | 16.954   | 17.107   | 17.122   |
| 16.119   | 16.259   | 16.436   | 16.548   | 16.535   |
| 16.019   | 16.109   | 16.222   | 16.327   | 16.309   |
| 15.969   | 15.967   | 16.056   | 16.106   | 16.091   |
|          |          |          |          |          |
| 13.500   | 12.226   | 11.744   | 11.637   | 11.435   |
| 13.700   | 12.561   | 12.098   | 11.992   | 11.833   |
| 13.900   | 12.873   | 12.431   | 12.321   | 12.187   |
| 14.100   | 13.162   | 12.743   | 12.630   | 12.510   |
| 14.300   | 13.434   | 13.038   | 12.923   | 12.810   |
| 14.500   | 13.693   | 13.319   | 13.203   | 13.095   |
| 14.700   | 13.943   | 13.589   | 13.473   | 13.367   |
| 14.900   | 14.185   | 13.850   | 13.734   | 13.629   |
| 15.100   | 14.421   | 14.103   | 13.989   | 13.883   |
| 15.300   | 14.652   | 14.350   | 14.237   | 14.131   |
| 15.500   | 14.880   | 14.591   | 14.480   | 14.374   |
| 15.700   | 15.104   | 14.828   | 14.719   | 14.613   |
| 15.900   | 15.325   | 15.061   | 14.954   | 14.848   |
| 16.100   | 15.544   | 15.291   | 15.186   | 15.080   |
| 16.300   | 15.761   | 15.517   | 15.415   | 15.309   |
| 16.500   | 15.976   | 15.741   | 15.642   | 15.537   |
| 16.700   | 16.190   | 15.963   | 15.866   | 15.762   |
| 16.900   | 16.402   | 16.182   | 16.089   | 15.986   |
| 17.100   | 16.613   | 16.400   | 16.309   | 16.208   |
| 17.300   | 16.824   | 16.616   | 16.528   | 16.429   |
| 17.500   | 17.033   | 16.830   | 16.746   | 16.648   |
| 17.700   | 17.241   | 17.043   | 16.962   | 16.867   |
| 17.900   | 17.449   | 17.255   | 17.177   | 17.085   |
| 18.100   | 17.657   | 17.466   | 17.392   | 17.301   |
| 18.400   | 17.966   | 17.780   | 17.711   | 17.626   |
| 18.500   | 18.069   | 17.884   | 17.817   | 17.733   |
| 18.600   | 18.178   | 17.993   | 17.932   | 17.839   |
| 18.700   | 18.290   | 18.106   | 18.046   | 17.955   |
| 18.800   | 18.402   | 18.225   | 18.171   | 18.083   |
| 18.900   | 18.520   | 18.361   | 18.305   | 18.229   |
| 19.000   | 18.660   | 18.529   | 18.494   | 18.420   |
| 19.100   | 18.803   | 18.694   | 18.665   | 18.619   |
| 19.200   | 18.931   | 18.843   | 18.826   | 18.768   |
| 19.300   | 19.045   | 18.962   | 18.951   | 18.894   |
| 19.400   | 19.154   | 19.078   | 19.062   | 19.015   |
| 19.600   | 19.361   | 19.289   | 19.275   | 19.225   |
| 19.800   | 19.559   | 19.485   | 19.474   | 19.423   |
| 20.000   | 19.752   | 19.674   | 19.660   | 19.611   |
| 20.200   | 19.942   | 19.860   | 19.843   | 19.791   |
| 20.400   | 20.129   | 20.039   | 20.020   | 19.962   |
| 20.600   | 20.314   | 20.215   | 20.191   | 20.127   |
| 20.800   | 20.496   | 20.388   | 20.358   | 20.286   |
| 21.000   | 20.677   | 20.557   | 20.521   | 20.441   |
| 21.200   | 20.855   | 20.723   | 20.680   | ...      |
| 21.400   | 21.031   | 20.887   | 20.836   | ...      |
| 21.600   | 21.206   | 21.048   | 20.988   | ...      |
| 21.800   | 21.380   | 21.207   | 21.139   | ...      |
| 22.000   | 21.552   | 21.365   | 21.285   | ...      |
| 22.200   | 21.724   | 21.521   | ...      | ...      |
| 22.400   | 21.894   | 21.678   | ...      | ...      |
| 22.600   | 22.066   | 21.832   | ...      | ...      |

**Table A12.** Fiducial sequences for NGC 7099 (M 30).

| $g_{P1}$ | $r_{P1}$ | $i_{P1}$ | $z_{P1}$ | $y_{P1}$ |
|----------|----------|----------|----------|----------|
| 15.737   | 15.943   | 16.183   | 16.319   | 16.375   |
| 15.337   | 15.472   | 15.665   | 15.760   | 15.788   |
| 15.237   | 15.322   | 15.451   | 15.539   | 15.562   |
| 15.187   | 15.180   | 15.285   | 15.318   | 15.344   |
|          |          |          |          |          |
| 12.500   | 11.365   | 10.872   | 10.727   | 10.519   |
| 12.700   | 11.681   | 11.210   | 11.071   | 10.898   |
| 12.900   | 11.978   | 11.528   | 11.394   | 11.251   |
| 13.100   | 12.258   | 11.826   | 11.695   | 11.580   |
| 13.300   | 12.520   | 12.106   | 11.977   | 11.883   |
| 13.500   | 12.765   | 12.373   | 12.247   | 12.163   |
| 13.700   | 13.001   | 12.629   | 12.505   | 12.429   |
| 13.900   | 13.230   | 12.879   | 12.756   | 12.685   |
| 14.100   | 13.455   | 13.121   | 13.001   | 12.934   |
| 14.300   | 13.677   | 13.360   | 13.242   | 13.176   |
| 14.500   | 13.897   | 13.595   | 13.478   | 13.415   |
| 14.700   | 14.114   | 13.826   | 13.712   | 13.650   |
| 14.900   | 14.330   | 14.054   | 13.942   | 13.884   |
| 15.100   | 14.544   | 14.280   | 14.172   | 14.114   |
| 15.300   | 14.758   | 14.504   | 14.399   | 14.343   |
| 15.500   | 14.971   | 14.727   | 14.623   | 14.570   |
| 15.700   | 15.184   | 14.947   | 14.848   | 14.796   |
| 15.900   | 15.394   | 15.167   | 15.071   | 15.020   |
| 16.100   | 15.606   | 15.386   | 15.294   | 15.245   |
| 16.300   | 15.816   | 15.603   | 15.514   | 15.468   |
| 16.500   | 16.027   | 15.819   | 15.735   | 15.691   |
| 16.700   | 16.237   | 16.036   | 15.954   | 15.912   |
| 16.900   | 16.447   | 16.250   | 16.174   | 16.133   |
| 17.100   | 16.656   | 16.465   | 16.391   | 16.354   |
| 17.300   | 16.866   | 16.679   | 16.609   | 16.575   |
| 17.500   | 17.075   | 16.892   | 16.827   | 16.795   |
| 17.600   | 17.179   | 16.998   | 16.936   | 16.905   |
| 17.700   | 17.284   | 17.105   | 17.044   | 17.015   |
| 17.800   | 17.388   | 17.211   | 17.153   | 17.125   |
| 17.900   | 17.504   | 17.333   | 17.281   | 17.258   |
| 18.000   | 17.624   | 17.469   | 17.432   | 17.398   |
| 18.100   | 17.754   | 17.617   | 17.597   | 17.576   |
| 18.200   | 17.898   | 17.784   | 17.771   | 17.767   |
| 18.300   | 18.021   | 17.931   | 17.919   | 17.921   |
| 18.400   | 18.140   | 18.060   | 18.061   | 18.060   |
| 18.500   | 18.254   | 18.180   | 18.184   | 18.198   |
| 18.700   | 18.462   | 18.395   | 18.402   | 18.419   |
| 18.900   | 18.659   | 18.594   | 18.598   | 18.607   |
| 19.100   | 18.852   | 18.784   | 18.783   | 18.794   |
| 19.300   | 19.046   | 18.972   | 18.971   | 18.977   |
| 19.500   | 19.236   | 19.154   | 19.150   | 19.153   |
| 19.700   | 19.423   | 19.333   | 19.324   | 19.325   |
| 19.900   | 19.608   | 19.508   | 19.493   | 19.490   |
| 20.100   | 19.790   | 19.680   | 19.658   | 19.652   |
| 20.300   | 19.970   | 19.848   | 19.819   | 19.807   |
| 20.500   | 20.148   | 20.013   | 19.976   | 19.959   |
| 20.700   | 20.325   | 20.177   | 20.129   | ...      |
| 20.900   | 20.499   | 20.338   | 20.280   | ...      |
| 21.100   | 20.672   | 20.497   | 20.427   | ...      |
| 21.300   | 20.843   | 20.654   | 20.572   | ...      |
| 21.500   | 21.014   | 20.810   | 20.716   | ...      |
| 21.700   | 21.183   | 20.965   | ...      | ...      |
| 21.900   | 21.352   | 21.119   | ...      | ...      |
| 22.100   | 21.519   | 21.273   | ...      | ...      |
| 22.300   | 21.687   | 21.428   | ...      | ...      |
| 22.500   | 21.854   | 21.582   | ...      | ...      |

**Table A13.** Fiducial sequences for Pal 12.

| $g_{P1}$ | $r_{P1}$ | $i_{P1}$ | $z_{P1}$ | $y_{P1}$ |
|----------|----------|----------|----------|----------|
| 15.300   | 14.276   | 13.853   | 13.648   | 13.531   |
| 15.500   | 14.522   | 14.115   | 13.923   | 13.811   |
| 15.700   | 14.765   | 14.375   | 14.194   | 14.087   |
| 15.900   | 15.006   | 14.631   | 14.462   | 14.359   |
| 16.100   | 15.245   | 14.884   | 14.725   | 14.627   |
| 16.300   | 15.481   | 15.135   | 14.986   | 14.892   |
| 16.500   | 15.716   | 15.382   | 15.242   | 15.153   |
| 16.700   | 15.947   | 15.628   | 15.495   | 15.410   |
| 16.900   | 16.178   | 15.870   | 15.745   | 15.665   |
| 17.100   | 16.405   | 16.110   | 15.991   | 15.915   |
| 17.300   | 16.632   | 16.346   | 16.234   | 16.162   |
| 17.500   | 16.856   | 16.582   | 16.475   | 16.407   |
| 17.700   | 17.078   | 16.813   | 16.712   | 16.648   |
| 17.900   | 17.299   | 17.044   | 16.947   | 16.886   |
| 18.100   | 17.518   | 17.271   | 17.178   | 17.122   |
| 18.300   | 17.735   | 17.497   | 17.408   | 17.354   |
| 18.500   | 17.950   | 17.720   | 17.634   | 17.584   |
| 18.700   | 18.164   | 17.941   | 17.859   | 17.811   |
| 18.900   | 18.376   | 18.161   | 18.080   | 18.036   |
| 19.100   | 18.587   | 18.378   | 18.300   | 18.257   |
| 19.300   | 18.796   | 18.593   | 18.516   | 18.477   |
| 19.500   | 19.004   | 18.806   | 18.732   | 18.694   |
| 19.600   | 19.109   | 18.909   | 18.842   | 18.799   |
| 19.700   | 19.220   | 19.026   | 18.953   | 18.901   |
| 19.800   | 19.326   | 19.136   | 19.064   | 19.014   |
| 19.900   | 19.441   | 19.258   | 19.189   | 19.142   |
| 19.970   | 19.533   | 19.361   | 19.296   | 19.254   |
| 19.980   | 19.581   | 19.429   | 19.371   | 19.339   |
| 19.950   | 19.640   | 19.532   | 19.490   | 19.480   |
| 20.000   | 19.714   | 19.619   | 19.582   | 19.577   |
| 20.100   | 19.830   | 19.743   | 19.709   | 19.708   |
| 20.300   | 20.034   | 19.957   | 19.930   | 19.927   |
| 20.500   | 20.241   | 20.164   | 20.142   | 20.140   |
| 20.700   | 20.434   | 20.360   | 20.343   | 20.325   |
| 20.900   | 20.623   | 20.547   | 20.539   | 20.475   |
| 21.100   | 20.810   | 20.727   | 20.725   | 20.601   |
| 21.300   | 20.991   | 20.910   | 20.895   | ...      |
| 21.500   | 21.170   | 21.085   | ...      | ...      |
| 21.700   | 21.346   | 21.255   | ...      | ...      |
| 21.900   | 21.523   | 21.421   | ...      | ...      |

**Table A14.** Fiducial sequences for NGC 188.

| $g_{P1}$ | $r_{P1}$ | $i_{P1}$ | $z_{P1}$ | $y_{P1}$ |
|----------|----------|----------|----------|----------|
| 14.000   | 13.256   | 12.965   | 12.777   | 12.773   |
| 14.200   | 13.495   | 13.182   | 13.007   | 13.012   |
| 14.400   | 13.722   | 13.399   | 13.230   | 13.241   |
| 14.600   | 13.938   | 13.616   | 13.447   | 13.458   |
| 14.800   | 14.144   | 13.832   | 13.655   | 13.665   |
| 15.100   | 14.453   | 14.150   | 13.976   | 13.982   |
| 15.240   | 14.600   | 14.300   | 14.128   | 14.135   |
| 15.360   | 14.734   | 14.440   | 14.272   | 14.281   |
| 15.440   | 14.828   | 14.540   | 14.376   | 14.388   |
| 15.450   | 14.859   | 14.580   | 14.422   | 14.437   |
| 15.400   | 14.852   | 14.590   | 14.445   | 14.466   |
| 15.270   | 14.785   | 14.550   | 14.423   | 14.455   |
| 15.150   | 14.707   | 14.490   | 14.375   | 14.414   |
| 15.110   | 14.716   | 14.520   | 14.419   | 14.466   |
| 15.150   | 14.777   | 14.590   | 14.495   | 14.545   |
| 15.300   | 14.951   | 14.773   | 14.668   | 14.740   |
| 15.500   | 15.144   | 14.969   | 14.887   | 14.945   |
| 15.700   | 15.344   | 15.168   | 15.078   | 15.128   |
| 15.900   | 15.529   | 15.355   | 15.258   | 15.309   |
| 16.100   | 15.721   | 15.535   | 15.435   | 15.482   |
| 16.300   | 15.906   | 15.708   | 15.609   | 15.654   |
| 16.500   | 16.092   | 15.882   | 15.777   | 15.818   |
| 16.700   | 16.272   | 16.050   | 15.939   | 15.976   |
| 16.900   | 16.447   | 16.213   | 16.095   | 16.128   |
| 17.100   | 16.617   | 16.371   | 16.246   | 16.273   |
| 17.300   | 16.782   | 16.524   | 16.391   | 16.413   |
| 17.500   | 16.944   | 16.673   | 16.532   | 16.547   |
| 17.700   | 17.104   | 16.818   | 16.668   | 16.677   |
| 17.900   | 17.261   | 16.959   | 16.799   | 16.802   |
| 18.100   | 17.416   | 17.096   | 16.927   | 16.922   |
| 18.300   | 17.570   | 17.232   | 17.052   | 17.039   |
| 18.500   | 17.722   | 17.363   | 17.173   | 17.152   |
| 18.700   | 17.875   | 17.494   | 17.290   | 17.262   |
| 18.900   | 18.028   | 17.621   | 17.406   | 17.369   |
| 19.100   | 18.181   | 17.748   | 17.518   | 17.474   |
| 19.300   | 18.336   | 17.874   | 17.629   | 17.576   |
| 19.500   | 18.493   | 17.999   | 17.738   | 17.677   |
| 19.700   | 18.652   | 18.123   | 17.845   | 17.777   |
| 19.900   | 18.814   | 18.247   | 17.951   | 17.875   |
| 20.100   | 18.979   | 18.372   | 18.056   | 17.972   |
| 20.300   | 19.149   | 18.497   | 18.160   | 18.069   |
| 20.500   | 19.324   | 18.623   | 18.264   | 18.167   |
| 20.700   | 19.504   | 18.751   | 18.368   | 18.265   |
| 20.900   | 19.690   | 18.880   | 18.472   | 18.363   |
| 21.100   | 19.881   | 19.011   | 18.576   | 18.462   |
| 21.300   | 20.079   | 19.145   | 18.681   | 18.562   |

**Table A15.** Fiducial sequences for NGC 2682 (M 67).

| $g_{P1}$ | $r_{P1}$ | $i_{P1}$ | $z_{P1}$ | $y_{P1}$ |
|----------|----------|----------|----------|----------|
| 12.536   | 11.804   | 11.564   | 11.480   | 11.430   |
| 12.800   | 12.091   | 11.854   | 11.758   | 11.710   |
| 13.220   | 12.531   | 12.302   | 12.211   | 12.160   |
| 13.240   | 12.580   | 12.365   | 12.281   | 12.235   |
| 13.200   | 12.583   | 12.387   | 12.313   | 12.274   |
| 12.800   | 12.387   | 12.282   | 12.255   | 12.252   |
| 12.800   | 12.424   | 12.336   | 12.318   | 12.321   |
| 12.860   | 12.515   | 12.441   | 12.430   | 12.439   |
| 12.920   | 12.566   | 12.509   | 12.500   | 12.509   |
| 13.300   | 12.928   | 12.864   | 12.848   | 12.857   |
| 13.500   | 13.146   | 13.055   | 13.059   | 13.068   |
| 13.700   | 13.345   | 13.250   | 13.259   | 13.263   |
| 13.900   | 13.544   | 13.454   | 13.448   | 13.448   |
| 14.100   | 13.737   | 13.638   | 13.629   | 13.625   |
| 14.300   | 13.927   | 13.817   | 13.803   | 13.794   |
| 14.500   | 14.107   | 13.990   | 13.970   | 13.958   |
| 14.700   | 14.283   | 14.158   | 14.132   | 14.115   |
| 14.900   | 14.455   | 14.321   | 14.289   | 14.265   |
| 15.100   | 14.628   | 14.481   | 14.439   | 14.411   |
| 15.300   | 14.798   | 14.636   | 14.586   | 14.552   |
| 15.500   | 14.970   | 14.787   | 14.727   | 14.688   |
| 15.700   | 15.139   | 14.934   | 14.865   | 14.818   |
| 15.900   | 15.305   | 15.079   | 14.998   | 14.946   |
| 16.100   | 15.464   | 15.221   | 15.127   | 15.069   |
| 16.300   | 15.615   | 15.360   | 15.254   | 15.189   |
| 16.500   | 15.769   | 15.497   | 15.378   | 15.306   |
| 16.700   | 15.921   | 15.632   | 15.499   | 15.420   |
| 16.900   | 16.077   | 15.765   | 15.618   | 15.532   |
| 17.100   | 16.228   | 15.896   | 15.734   | 15.641   |
| 17.300   | 16.379   | 16.026   | 15.850   | 15.749   |
| 17.500   | 16.527   | 16.155   | 15.963   | 15.855   |
| 17.700   | 16.681   | 16.284   | 16.076   | 15.961   |
| 17.900   | 16.843   | 16.413   | 16.189   | 16.066   |
| 18.100   | 17.008   | 16.542   | 16.300   | 16.170   |
| 18.300   | 17.170   | 16.671   | 16.412   | 16.275   |
| 18.500   | 17.334   | 16.802   | 16.525   | 16.380   |
| 18.700   | 17.507   | 16.933   | 16.638   | 16.485   |
| 18.900   | 17.687   | 17.065   | 16.751   | 16.592   |
| 19.100   | 17.870   | 17.199   | 16.867   | 16.700   |
| 19.300   | 18.057   | 17.335   | 16.983   | 16.810   |
| 19.500   | 18.249   | 17.472   | 17.102   | 16.922   |
| 19.700   | 18.447   | 17.613   | 17.223   | 17.036   |
| 19.900   | 18.648   | 17.756   | 17.347   | 17.153   |
| 20.100   | 18.849   | 17.901   | 17.474   | 17.273   |
| 20.300   | 19.050   | 18.052   | 17.605   | 17.397   |
| 20.500   | 19.251   | 18.205   | 17.738   | 17.524   |
| 20.700   | 19.451   | 18.362   | 17.876   | 17.656   |
| 20.900   | 19.652   | 18.523   | 18.018   | 17.792   |
| 21.100   | 19.852   | 18.689   | 18.164   | 17.933   |
| 21.300   | 20.053   | 18.860   | 18.316   | 18.079   |
| 21.500   | 20.252   | 19.036   | 18.473   | 18.231   |
| 21.700   | 20.452   | 19.217   | 18.635   | 18.389   |
| 21.900   | 20.651   | 19.405   | 18.804   | 18.552   |

**Table A16.** Fiducial sequences for NGC 6791.

| $g_{P1}$ | $r_{P1}$ | $i_{P1}$ | $z_{P1}$ | $y_{P1}$ |
|----------|----------|----------|----------|----------|
| 14.600   | 13.329   | 12.700   | 12.412   | 12.232   |
| 14.800   | 13.582   | 13.002   | 12.732   | 12.566   |
| 15.000   | 13.832   | 13.295   | 13.041   | 12.887   |
| 15.200   | 14.077   | 13.580   | 13.341   | 13.197   |
| 15.400   | 14.318   | 13.858   | 13.630   | 13.494   |
| 15.600   | 14.555   | 14.127   | 13.909   | 13.781   |
| 15.800   | 14.788   | 14.386   | 14.176   | 14.057   |
| 16.000   | 15.018   | 14.638   | 14.435   | 14.322   |
| 16.200   | 15.243   | 14.882   | 14.686   | 14.578   |
| 16.400   | 15.464   | 15.117   | 14.928   | 14.826   |
| 16.600   | 15.682   | 15.346   | 15.161   | 15.064   |
| 16.800   | 15.896   | 15.569   | 15.388   | 15.295   |
| 17.000   | 16.106   | 15.784   | 15.608   | 15.519   |
| 17.200   | 16.316   | 15.993   | 15.825   | 15.738   |
| 17.400   | 16.530   | 16.206   | 16.043   | 15.961   |
| 17.600   | 16.740   | 16.422   | 16.263   | 16.171   |
| 17.780   | 16.932   | 16.622   | 16.454   | 16.365   |
| 17.860   | 17.021   | 16.715   | 16.550   | 16.463   |
| 17.880   | 17.044   | 16.740   | 16.576   | 16.490   |
| 17.900   | 17.077   | 16.778   | 16.618   | 16.535   |
| 17.900   | 17.104   | 16.818   | 16.668   | 16.590   |
| 17.880   | 17.109   | 16.834   | 16.692   | 16.619   |
| 17.840   | 17.100   | 16.839   | 16.707   | 16.642   |
| 17.740   | 17.056   | 16.821   | 16.708   | 16.655   |
| 17.700   | 17.040   | 16.815   | 16.710   | 16.662   |
| 17.680   | 17.036   | 16.819   | 16.719   | 16.675   |
| 17.680   | 17.055   | 16.847   | 16.753   | 16.714   |
| 17.700   | 17.083   | 16.878   | 16.787   | 16.749   |
| 17.740   | 17.131   | 16.930   | 16.842   | 16.805   |
| 17.820   | 17.220   | 17.023   | 16.938   | 16.903   |
| 17.900   | 17.306   | 17.108   | 17.023   | 16.979   |
| 18.100   | 17.509   | 17.312   | 17.233   | 17.189   |
| 18.300   | 17.702   | 17.505   | 17.421   | 17.378   |
| 18.500   | 17.887   | 17.686   | 17.603   | 17.555   |
| 18.700   | 18.071   | 17.861   | 17.773   | 17.721   |
| 18.900   | 18.250   | 18.030   | 17.936   | 17.880   |
| 19.100   | 18.424   | 18.193   | 18.093   | 18.033   |
| 19.300   | 18.595   | 18.352   | 18.246   | 18.179   |
| 19.500   | 18.761   | 18.505   | 18.391   | 18.318   |
| 19.700   | 18.924   | 18.655   | 18.531   | 18.453   |
| 19.900   | 19.085   | 18.799   | 18.667   | 18.582   |
| 20.100   | 19.243   | 18.939   | 18.798   | 18.705   |
| 20.300   | 19.400   | 19.076   | 18.924   | 18.824   |
| 20.500   | 19.556   | 19.209   | 19.045   | 18.937   |
| 20.700   | 19.711   | 19.340   | 19.162   | 19.047   |
| 20.900   | 19.866   | 19.466   | 19.275   | 19.151   |
| 21.100   | 20.022   | 19.591   | 19.386   | 19.251   |
| 21.300   | 20.180   | 19.712   | 19.492   | 19.347   |
| 21.500   | 20.339   | 19.832   | 19.595   | 19.440   |
| 21.700   | 20.500   | 19.949   | 19.695   | 19.530   |
| 21.900   | 20.664   | 20.066   | 19.792   | 19.616   |
| 22.100   | 20.831   | 20.180   | 19.886   | 19.698   |
| 22.300   | 21.002   | 20.294   | 19.979   | 19.778   |
